# Supplementary material for: RMalign: an RNA structural alignment tool based on a novel scoring function RMscore
Source: PubMed Central journal article supplement (PMC6454663; doi:10.1186/s12864-019-5631-3), 2019-04-08
Supplement: 12864_2019_5631_MOESM1_ESM.pdf [file 12864_2019_5631_MOESM1_ESM.pdf]

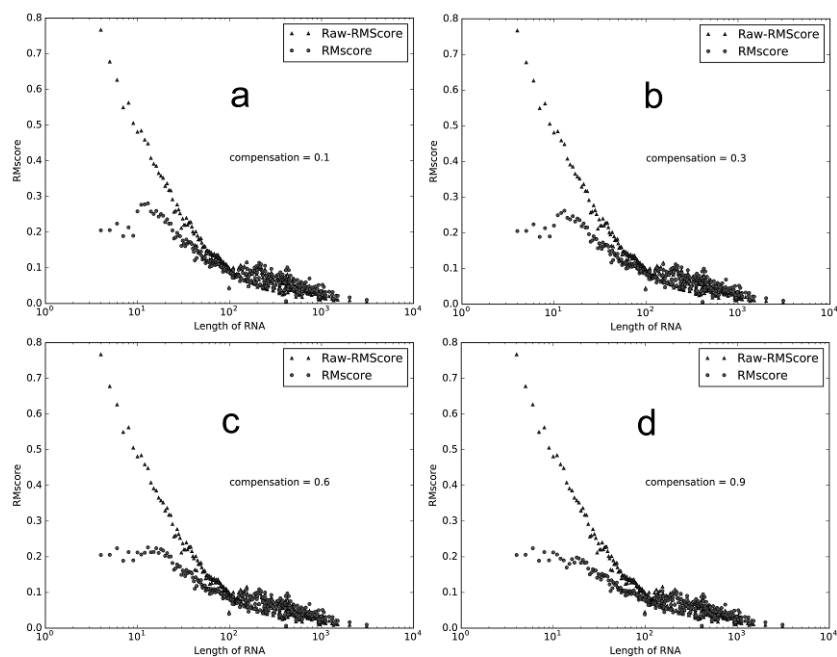

**Figure S1.** RNA structural similarity vs the length of RNA. The length of RNA is plotted against RMscore with a different compensation (a is 0.1, b is 0.3, d is 0.6 and d is 0.9) to smooth the average RMscore at a smaller length, in random pairs 0.3M. RNA alignment is accomplished by needle in EMBOSS package. Raw-RMscore means that d0 is assigned to 5 angstrom in RMscore definition. The compensation is chosen as 0.6 that will result in the smoothest curver.
