# Supplementary material for: RMalign: an RNA structural alignment tool based on a novel scoring function RMscore
Source: PubMed Central journal article supplement (PMC6454663; doi:10.1186/s12864-019-5631-3), 2019-04-08
Supplement: 12864_2019_5631_MOESM2_ESM.pdf [file 12864_2019_5631_MOESM2_ESM.pdf]

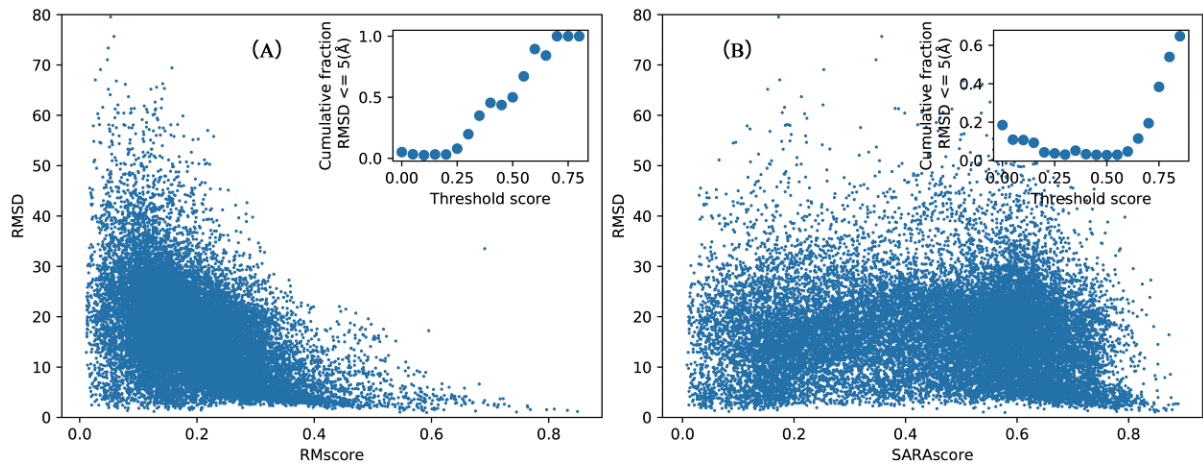

**Figure S2.** *RMSD vs RNA structural similarity.* SARAscore (A) and RMscore are plotted against RMSD in 0.1 million randomly selected pairs, RNA structural alignment are accomplished by SARA. The insets show the fraction of RNA-RNA pairs with RMSD  $\leq 5$  Å are plotted with 0.05 bins to show the phase transition from dissimilar RNA pairs to the similar pairs.
