# Supplementary material for: RMalign: an RNA structural alignment tool based on a novel scoring function RMscore
Source: PubMed Central journal article supplement (PMC6454663; doi:10.1186/s12864-019-5631-3), 2019-04-08
Supplement: 12864_2019_5631_MOESM5_ESM.pdf [file 12864_2019_5631_MOESM5_ESM.pdf]

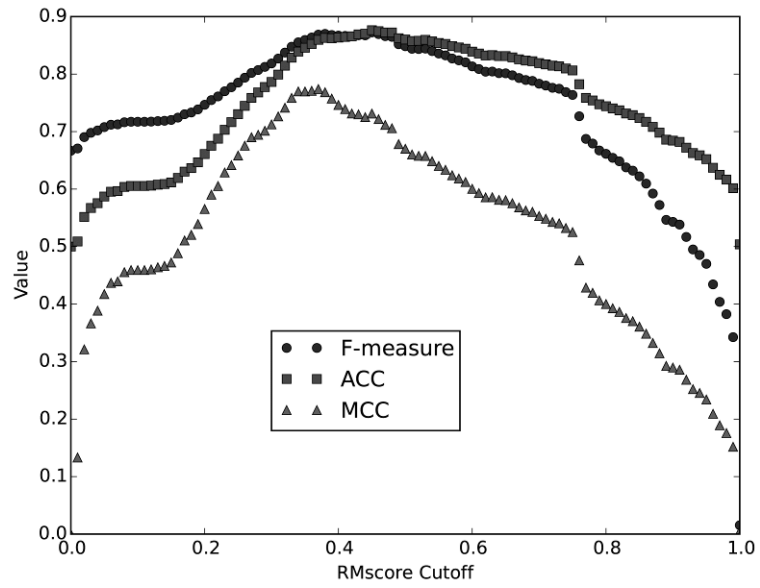

**Figure S5.** *F-measure, ACC, MCC vs RMscore cut-off.* F-measure, ACC

(accuracy) and MCC are plotted against RMscore cut-off selected to predict the positive or negative pairs in benchmarking on balance-FSCOR.
