# Supplementary material for: RMalign: an RNA structural alignment tool based on a novel scoring function RMscore
Source: PubMed Central journal article supplement (PMC6454663; doi:10.1186/s12864-019-5631-3), 2019-04-08
Supplement: 12864_2019_5631_MOESM6_ESM.pdf [file 12864_2019_5631_MOESM6_ESM.pdf]

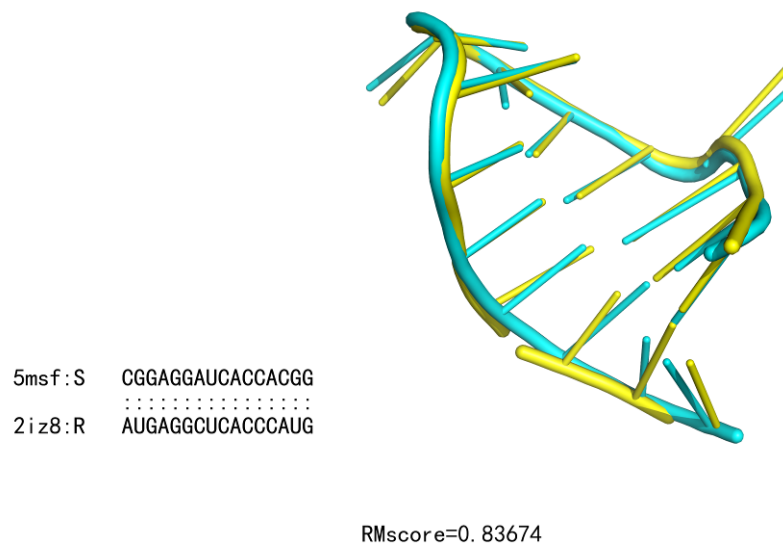

**Figure S6.** *A false positive example of RAlign benchmarking in balance-SCOR.*

5msf:S (yellow) is superposed on 2iz8:R (cyan) by RAlign. These two RNA structures are very similar (RMscore = 0.837). But they are belonged to two distinct function classes in FSCOR (Phage\_coat\_protein\_binding, MS2\_phage\_coat\_protein\_binding\_stem-loop).
