# Supplementary material for: RMalign: an RNA structural alignment tool based on a novel scoring function RMscore
Source: PubMed Central journal article supplement (PMC6454663; doi:10.1186/s12864-019-5631-3), 2019-04-08
Supplement: 12864_2019_5631_MOESM7_ESM.pdf [file 12864_2019_5631_MOESM7_ESM.pdf]

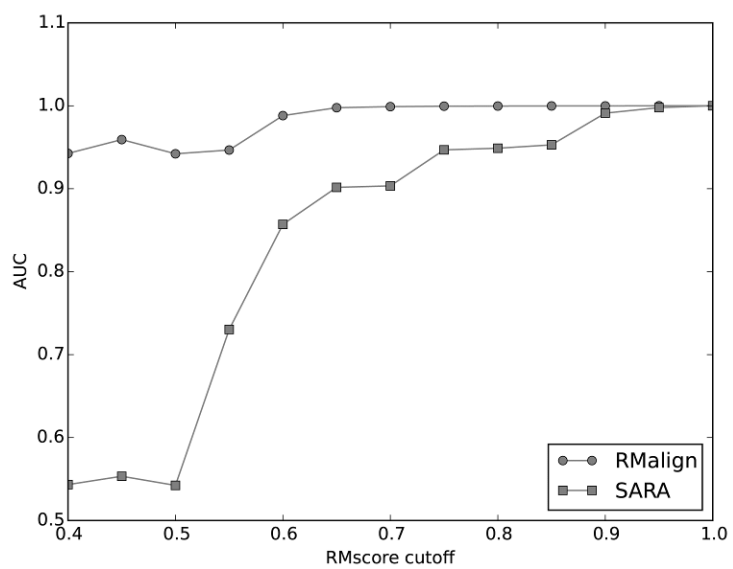

**Figure S7.** Benchmarking of *RAlign* and *SARA* in *balance-x-FSCOR*.
